# Supplementary material for: Greenhouse Gas Emissions-Based Development and Characterization of Optimal Scenarios for Municipal Solid and Sewage Sludge Waste Management in Astana City
Source: MDPI journal article supplement (doi:10.3390/su142315850), 2022-11-28
Supplement: s1 [file s1]

## SUPPLEMENTARY MATERIAL

# Greenhouse Gas Emissions-Based Development and Characterization of Optimal Scenarios for Municipal Solid and Sewage Sludge Waste Management in Astana City

Aknur Temireyeva <sup>1</sup>, Khabiba Zhunussova <sup>1</sup>, Madiyar Aidabulov <sup>1</sup>, Christos Venetis <sup>2</sup>, Yerbol Sarbassov <sup>3</sup> and Dhawal Shah <sup>1,\*</sup>

- <sup>1</sup> Chemical and Materials Engineering Department, School of Engineering and Digital Sciences, Nazarbayev University, Astana 010000, Kazakhstan; aknur.temireyeva@nu.edu.kz (A.T.); khabiba.zhunussova@nu.edu.kz (K.Z.); madiyar.aidabulov@nu.edu.kz (M.A.)
- <sup>2</sup> Environmental Solutions Department, MYTILINEOS SA, 15125 Marousi, Greece; christos.venetis@metka.com
- <sup>3</sup> Mechanical and Aerospace Engineering Department, School of Engineering and Digital Sciences, Nazarbayev University, Astana 010000, Kazakhstan; ysarbassov@nu.edu.kz
- \* Correspondence: dhawal.shah@nu.edu.kz

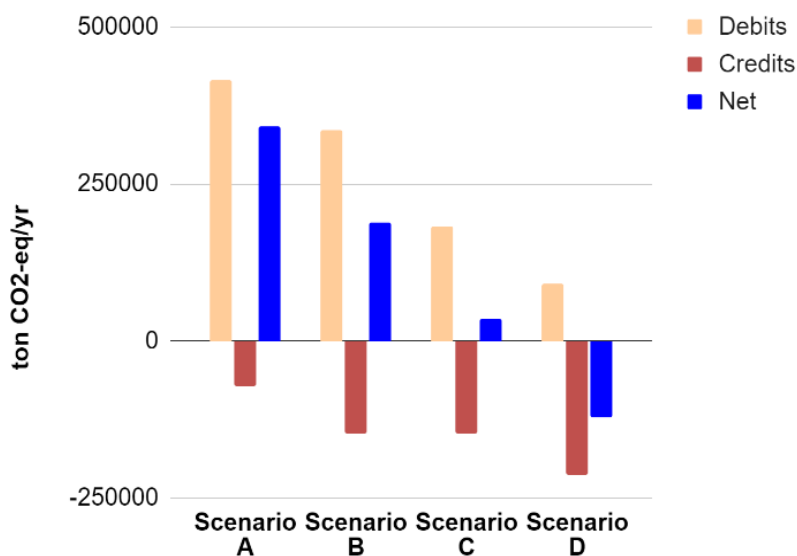

**Figure S1.** Debits, credits and net GHG emissions in the four MSW scenarios

**Table S1.** MSW mass balance and cost analysis of the scenarios

|                                    | Mass Balance of MSW over different scenarios (t/year) |            |            |            |
|------------------------------------|-------------------------------------------------------|------------|------------|------------|
|                                    | Scenario A                                            | Scenario B | Scenario C | Scenario D |
| Recycling                          | 65 148                                                | 132 057    | 132 057    | 132 057    |
| Composting                         | 0                                                     | 0          | 0          | 88 896     |
| Incineration                       | 0                                                     | 0          | 0          | 217 047    |
| Landfilling without gas collection | 372 852                                               | 0          | 0          | 0          |
| Landfilling with gas collection    | 0                                                     | 305 943    | 0          | 0          |
| BS + landfill                      | 0                                                     | 0          | 305 943    | 0          |
| Total MSW (t/year)                 | 438 000                                               |            |            |            |
| Cost (€/year)                      |                                                       |            |            |            |
|                                    | Scenario 1                                            | Scenario 2 | Scenario 3 | Scenario 4 |
| Recycling                          | 325 741                                               | 6 602 85   | 660 285    | 660 285    |
| Composting                         | 0                                                     | 0          | 0          | 888 965    |
| Incineration                       | 0                                                     | 0          | 0          | 15 193 256 |
| Landfilling without gas collection | 1 491 408                                             | 0          | 0          | 0          |
| Landfilling with gas collection    | 0                                                     | 4 895 088  | 0          | 0          |
| BS + landfill                      | 0                                                     | 0          | 6 118 860  | 0          |
| Total cost (€)                     | 1 817 148                                             | 5 555 373  | 6 779 145  | 16 742 506 |

**Table S2.** Debits, credits and net GHG emissions

|                            |                | <b>Scenario A</b> | <b>Scenario B</b> | <b>Scenario C</b> | <b>Scenario D</b> |
|----------------------------|----------------|-------------------|-------------------|-------------------|-------------------|
| <b>Recycled waste</b>      | <b>Debits</b>  | 22 805            | 46 227            | 46 227            | 52 028            |
|                            | <b>Credits</b> | - 72 642          | - 147 248         | - 147 248         | - 153 581         |
| <b>Disposed of waste</b>   | <b>Debits</b>  | 391 438           | 289 484           | 137 057           | 39 667            |
|                            | <b>Credits</b> | 0                 | 0                 | 0                 | - 58 944          |
| <b>Total MSW treatment</b> | <b>Debits</b>  | 414 248           | 335 717           | 183 290           | 91 700            |

|  |                |          |           |           |           |
|--|----------------|----------|-----------|-----------|-----------|
|  | <b>Credits</b> | - 72 642 | - 147 248 | - 147 248 | - 212 525 |
|  | <b>Net</b>     | 341 606  | 188 469   | 36 042    | - 120 826 |

**Table S3.** SS mass balance and cost analysis of the scenarios

|                   | Mass Balance of sludge over different scenarios (t/year) |            |            |
|-------------------|----------------------------------------------------------|------------|------------|
|                   | Scenario 1                                               | Scenario 2 | Scenario 3 |
| Landfilling       | 109 500                                                  | 0          | 0          |
| Mono-incineration | 0                                                        | 109 500    | 0          |
| Co-incineration   | 0                                                        | 0          | 109 500    |
| Total SS (t/year) | 109 500                                                  |            |            |
| Cost (€/year)     |                                                          |            |            |
|                   | Scenario 1                                               | Scenario 2 | Scenario 3 |
| Landfilling       | 4 106 250                                                | 0          | 0          |
| Mono-incineration | 0                                                        | 14 388 300 | 0          |
| Co-incineration   | 0                                                        | 0          | 10 950 000 |
| Total cost (€)    | 4 106 250                                                | 14 388 300 | 10 950 000 |
